# Supplementary material
Source: publisher figshare collection journal article supplement (https://sage.figshare.com/ndownloader/files/23166617)
Supplement: Supplementary file 1 [file 23166617]

Appendix C: Latent Class Results

|  |  | Class 1 | | Class 2 | |
| --- | --- | --- | --- | --- | --- |
|  |  | **Mean** | **SE** | **Mean** | **SE** |
| Life extension | 3 months | 0.00 | 0.00 | 0.00 | 0.00 |
| 6 months | 4.84 | 0.16 | 3.03 | 0.67 |
| 12 months | 6.07 | 0.17 | 5.96 | 0.68 |
| 18 months | 8.96 | 0.19 | 7.95 | 0.70 |
| 24 months | 10.00 | 0.21 | 10.00 | 0.74 |
|  |  |  |  |  |  |
| Toxicity-free days | 10% more days | 0.00 | 0.00 | 0.00 | 0.00 |
| 30% more days | 0.33 | 0.14 | 0.65 | 0.24 |
| 60% more days | 1.55 | 0.14 | 0.89 | 0.28 |
| 80% more days | 2.91 | 0.14 | 1.41 | 0.27 |
|  |  |  |  |  |  |
| Changes in side effects | 10% fewer major side effects | -1.26 | 0.14 | -0.44 | 0.26 |
| 5% fewer major side effects | -0.08 | 0.13 | 0.14 | 0.23 |
| No change in any side effects | 0.00 | 0.00 | 0.00 | 0.00 |
| 5% more major side effects | 1.32 | 0.13 | 0.11 | 0.23 |
|  |  |  |  |  |  |
| Treatment requirements | 3-hr IV infusion every 2 weeks | 3.04 | 0.13 | -0.11 | 0.23 |
| 1-hour IV infusion every 3 weeks | 4.10 | 0.14 | 0.68 | 0.28 |
| 5-hour IV infusion every 2 weeks | 2.58 | 0.14 | -0.22 | 0.23 |
| Physician-administered injection 12 days per month | 0.00 | 0.00 | 0.00 | 0.00 |
|  |  |  |  |  |  |
| Out-of-pocket costs | $25 per month | 0.00 | 0.00 | 0.00 | 0.00 |
| $100 per month | -0.24 | 0.12 | 0.36 | 0.27 |
| $1,000 per month | -7.99 | 0.15 | -0.54 | 0.28 |
| $2,000 per month | -10.94 | 0.18 | -1.21 | 0.29 |
|  |  |  |  |  |  |
| Insurance company costs | $8,000 per month | 0.00 | 0.00 | 0.00 | 0.00 |
| $12,500 per month | 0.46 | 0.13 | -0.35 | 0.24 |
| $17,000 per month | -0.89 | 0.14 | 0.01 | 0.25 |
| $20,000 per month | -0.83 | 0.14 | -0.59 | 0.27 |
|  |  |  |  |  |  |
| Available test | Test available and it indicates the therapy will work for you | 5.58 | 0.09 | 0.78 | 0.17 |
| No test available to determine if this will work for you | 0.00 | 0.00 | 0.00 | 0.00 |
